# Supplementary material for: XIAP variants in male Crohn's disease
Source: HighWire-hosted journal article supplement (doi:10.1136/gutjnl-2013-306520), 2014-02-26
Supplement: gutjnl-2013-306520supp.pdf [file gutjnl-2013-306520supp.pdf]

## **Supplementary Content**

|                                 |    |
|---------------------------------|----|
| Supplementary Results.....      | 2  |
| Supplementary Methods.....      | 5  |
| Supplementary Figures 1-6 ..... | 7  |
| Supplementary Tables 1-5.....   | 13 |
| Supplementary References.....   | 18 |

Authors: Yvonne Zeissig, Britt-Sabina Petersen, Snezana Milutinovic, Esther Bosse, Gabriele

Mayr, Kenneth Peuker, Jelka Hartwig, Andreas Keller, Martina Kohl, Martin W. Laass, Susanne

Billmann-Born, Heide Brandau, Alfred Feller, Christoph Röcken, Martin Schrappe, Philip

Rosenstiel, John C. Reed, Stefan Schreiber, Andre Franke, Sebastian Zeissig

## **Supplementary Results**

### **Clinical history of patients harboring *XIAP* variants**

#### **Patient 1 (XIAP E99X)**

A Caucasian male patient presented with bloody diarrhea and anal fissure at the age of nine months. Initially, cow's milk protein intolerance was suspected. However dietary exclusion of milk protein did not resolve symptoms. At the age of 19 months, a colonoscopy was performed, which demonstrated severe, erosive, discontinuous pancolitis with anal fissures and anal stenosis and histological demonstration of superficial, erosive, and ulcerative inflammation with crypt abscesses but without epithelioid granulomas. Histologic and serologic testing for EBV, CMV, and mycobacteria was negative. The family history was negative for immunodeficiency syndromes and inflammatory bowel disease. The subsequent course of disease was refractory to treatment with local and oral mesalazine, corticosteroids, antibiotics, probiotics, and with intolerance to azathioprine (pancreatitis). Anal dilatation was associated with symptomatic relief. Colonoscopy at 31 months of age revealed a similar picture of moderate to severe colitis, anal fissures, and anal stenosis. Upper endoscopy and MR enterography did not reveal signs of macroscopic small intestinal or upper gastrointestinal disease. However, histologic examination demonstrated low-grade, chronic, *Helicobacter pylori*-negative gastritis and duodenitis in accordance with upper gastrointestinal CD. An MRI revealed hepatosplenomegaly. In addition, papular and pustular skin manifestations were found at the back and thighs with histiocytic infiltrates and epithelioid cells in accordance with a cutaneous CD manifestation. Following primary failure of infliximab, the patient received a loop ileostomy at the age of 36 months, which was associated with significant clinical improvement despite persistent mild, discontinuous colitis. At 40 months of age, surgical treatment of an anocutaneous fistula was performed. Since then, the patient has been in clinical remission for more than 17 months without treatment. Self-limiting episodes of fever have occurred, but never fulfilled the criteria of hemophagocytic lymphohistiocytosis (HLH). The patient continues to be negative for EBV. A summary of laboratory findings is shown in Table S2 and S3. The patient was

classified as A1a, L2 + L4a, B2p according to the Paris modification of the Montreal classification [1].

#### Patient 2 (XIAP G39C)

Patient 2 is a male Caucasian with CD and an indicated age of onset at 13 years, who was enrolled in an infliximab study at the age of 38 years. Further clinical information on this patient was not available.

#### Patient 3 (XIAP K297T)

In a Caucasian male patient, the diagnosis of CD was made at the age of 16 years after a one year history of abdominal pain, diarrhea, and weight loss of 10 kg (onset of disease at the age of 15 years). Endoscopy of the upper and lower gastrointestinal tract showed discontinuous, ulcerative inflammation of the jejunum, terminal ileum, left colon, sigmoid colon, and rectum as well as of the gastric antrum with mild pyloric stenosis (Fig. S5). Perianal disease was mild with skin tags but no fistulae. Histology showed multiple granulomas in all inflamed parts of the gastrointestinal tract including the gastric antrum. Disease classification according to the Paris modification of the Montreal classification for CD [1] was A1b, L3+L4a/L4b, B2p. The patient was tested positive for ASCA IgA and negative for ANCA antibodies. The personal and family history were negative for immunodeficiencies and inflammatory bowel disease.

Under an exclusive enteral nutrition for 6 weeks, clinical remission was achieved, although laboratory values (elevated C-reactive protein and fecal calprotectin) still showed disease activity. The patient intermittently required corticosteroid treatment. Azathioprine treatment was initiated at the age of 16 years. At the age of 17 (18 month after the diagnosis of CD was made), infliximab was initiated in addition to azathioprine. At the age of 19, infliximab intervals needed to be reduced to 4 weeks. The patient continued to require intermittent corticosteroid treatment (budesonide) and

infusions of iron (ferric carboxymaltose). Currently, the patient is in stable condition and receives infliximab (4-weekly interval), azathioprine, mesalamine, pantoprazole, zinc, vitamin d, folic acid and supplemental enteral nutrition.

The patient was tested negative for three CD-associated variants of NOD2: R702W (SNP8), G908R (SNP12), 3020insC (SNP13).

#### Patient 4 (W323X)

Patient 4, a male Caucasian, was diagnosed with CD at the age of 16 years in 1966 (A1b, L3, B2B3p according to the Paris modification of the Montreal classification [1]). The family history was negative for IBD. Due to fulminant colitis, the patient underwent colectomy with ileostomy at the age of 16 years. A stenosing and fistulizing course of ileitis required several consecutive ileal resections in the first year following diagnosis and again at the age of 29 years (1979). From the time of diagnosis until the age of 52, the patient received corticosteroids on a continuous basis. Azathioprine was initiated at the age of 50 but was discontinued after 8 months of treatment due to severe leukopenia associated with recurrent and persistent respiratory infections. The patient reported at our center at the age of 53 (2003), when infliximab treatment was initiated due to severe ileitis with enterocutaneous fistulas. Infliximab was discontinued after 4 months of treatment due to severe pneumonia requiring mechanical ventilation but with negative microbiological testing including negative results for *M. tuberculosis*. After recovery, the patient underwent resection of a stenotic jejunal segment with an enterocutaneous fistula. Following surgery, the patient acquired a nosocomial pneumonia and died at the age of 54. The patient was tested negative for EBV at several occasions.

## **Supplementary Methods**

### **Cell lines**

*XIAP*-deficient and -sufficient HCT116 cells were a gift from B. Vogelstein (Johns Hopkins University) [2]. HCT116 and 293T cells were cultured in RPMI-1640 containing 10% FCS.

### **Flow cytometry**

Flow cytometry was performed as described previously [3]. Briefly, cells were staining with monoclonal antibodies for 20 min at 4°C. For detection of iNKT cells, staining with PBS57-loaded CD1d tetramers (1h, 4°C, NIH Tetramer Core Facility) was performed. Data were collected using a BD Biosciences FACSVerse and were analyzed by Flowjo (Tree Star, Inc., Ashland, OR). For intracellular staining, cells were first surface-stained, then permeabilized with Cytofix/Cytoperm (BD Biosciences) and washed with Perm/Wash buffer (BD Biosciences) according to the manufacturer's instructions. Antibodies were added for 30 min at 4°C before washing with Perm/Wash buffer. Antibodies and reagents used for flow cytometry were obtained from BD Biosciences except for CD1d-PBS57 tetramers (NIH Tetramer Core Facility). Via-Probe (BD Biosciences), and in case of intracellular staining, fixable viability dye eFluor 450 (eBioscience, Frankfurt, Germany), was added to all stainings for exclusion of dead cells. XIAP clone 48 (BD Biosciences) was used for detection of intracellular XIAP according to [4].

### **Western blotting and immunoprecipitation**

Immunoprecipitation was performed as described previously with minor modifications [5]. Briefly, 293T cells were transfected using Lipofectamine 2000 (Invitrogen) with Flag-RIPK2 together with either empty vector (pcDNA), mycXIAPwt or mutant mycXIAP. 24h after transfection, the cells were lysed and protein complexes were immunoprecipitated using anti-myc antibody, followed by SDS-PAGE and immunoblotting using anti-myc and anti-Flag antibodies. Western blotting was performed as described previously [5]. The following antibodies were used: anti-myc (Roche),

anti-flag (M2, Sigma-Aldrich), rabbit anti-caspase-1 (D7F10; Cell Signaling Technology), mouse anti-XIAP (clone 48, BD Biosciences), mouse anti- $\beta$ -actin (Sigma-Aldrich).

### **Monocyte-derived DCs and lentiviral reconstitution**

Monocytes were extracted from PBMCs by positive selection using CD14 magnetic beads (Miltenyi Biotec) and were cultured at  $1 \times 10^6$  cells/ml for 5 days in complete RPMI-1640 medium supplemented with 500 U/ml recombinant hIL-4 and 1000 U/ml recombinant hGM-CSF (PeproTech). Lentiviral production and transduction was performed as described previously [3]. Briefly, lentiviral particles were generated in 293T cells using pCMV $\Delta$ R8.9 and pMD2.G [6]. Lentiviral particles were concentrated by ultracentrifugation and titered by GFP expression in 293T cells. On day 3 after isolation of monocytes, monocyte-derived DCs were infected with lentiviruses expressing XIAP and GFP [5] or a control virus expressing GFP only at an MOI of 20 in RPMI-1640 containing 10  $\mu$ g/ml protamine sulphate (Sigma Aldrich). Immature transduced DCs were cultured at  $1 \times 10^6$  cells/ml until day 5 when they were investigated in functional studies.

**Supplementary Figures 1-6**

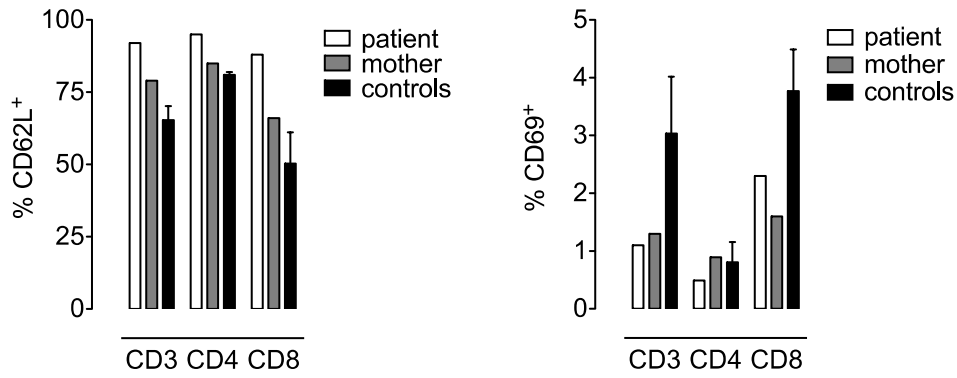

**Figure S1. Naive T cell profile in the XIAP E99X patient (Patient 1)**

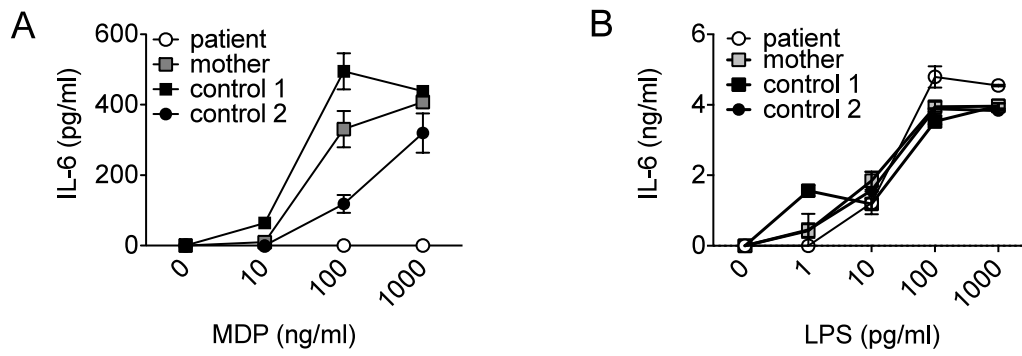

**Figure S2. A severe and selective defect in NOD2-dependent IL-6 secretion in the XIAP E99X patient (Patient 1)**

IL-6 secretion as determined by ELISA in supernatants of PBMCs treated with the MDP (A) or LPS (B) for 24h. Mean  $\pm$  s.e.m. of triplicate cultures are shown.



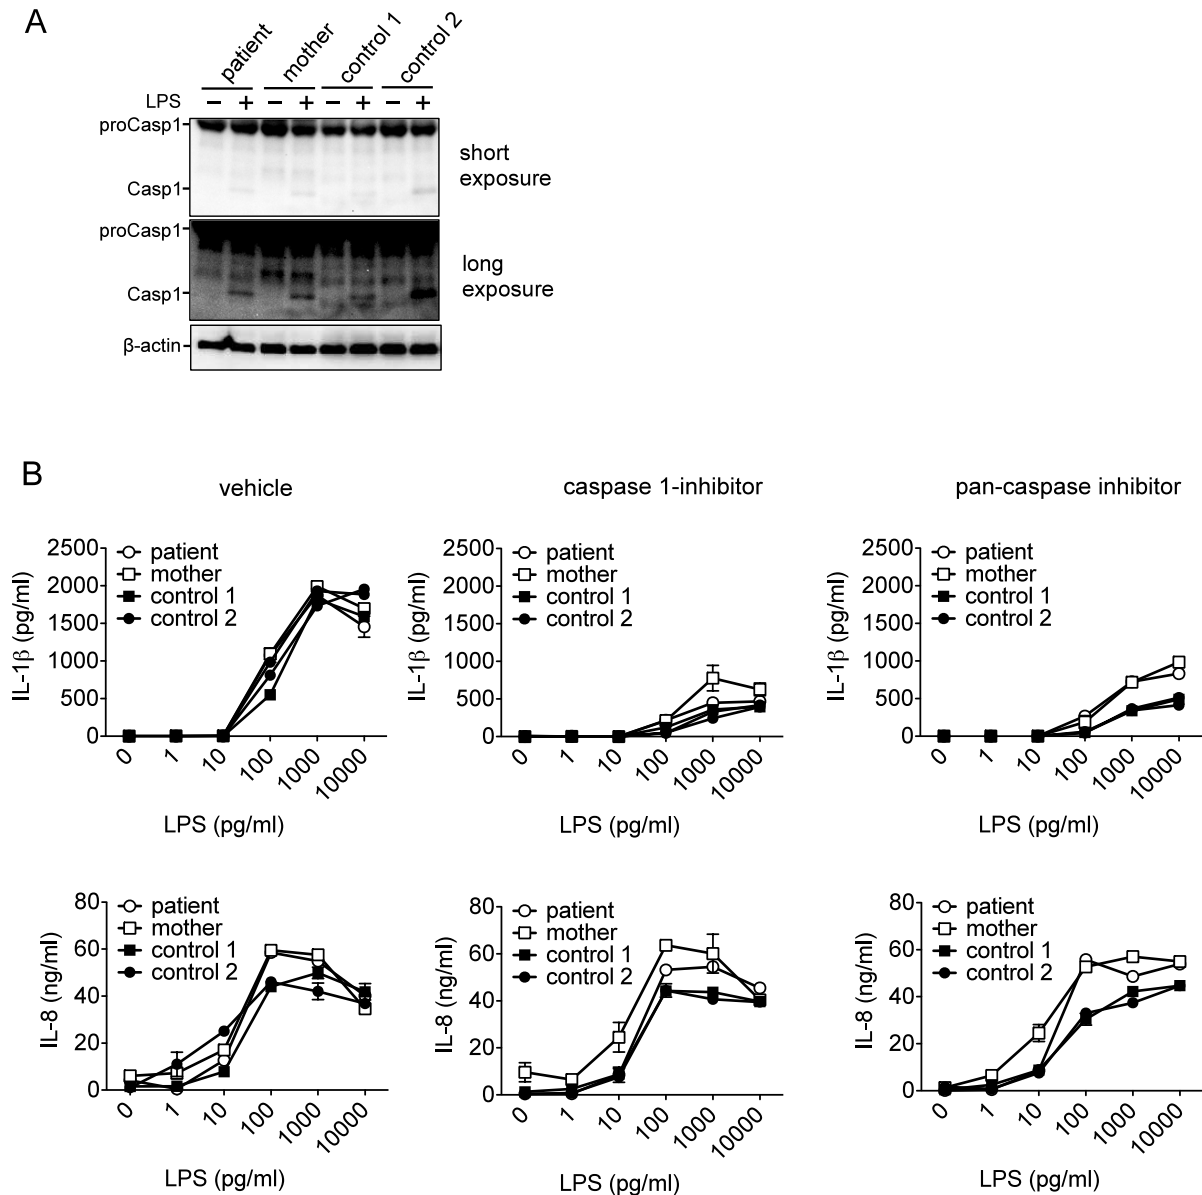

**Figure S3. Unaltered caspase-1 cleavage and IL-1 $\beta$  secretion in the XIAP E99X patient (Patient 1)**

A: Caspase-1 cleavage in primary PBMCs induced by treatment with 10 ng/ml LPS for 8 hours as detected by western blotting. B: IL-1 $\beta$  (upper panel) and IL-8 (lower panel) secretion by PBMCs upon stimulation with LPS at the indicated concentration as determined by ELISA. Where indicated, caspase-1 inhibitor (middle panels, Z-YVAD-fmk, 10  $\mu$ M) or pan-caspase inhibitor (right panels; Z-VAD-fmk, 10  $\mu$ M) was added to confirm that IL-1 $\beta$  secretion is mediated by caspase-1. In B, mean  $\pm$  s.e.m. of triplicate cultures is shown.

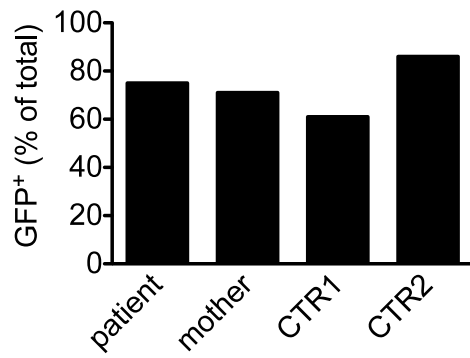

**Figure S4. Lentiviral transduction rates of monocyte-derived dendritic cells (moDCs)**

The percentage of GFP-positive moDCs 48h after transduction with lentiviruses expressing XIAP is indicated.

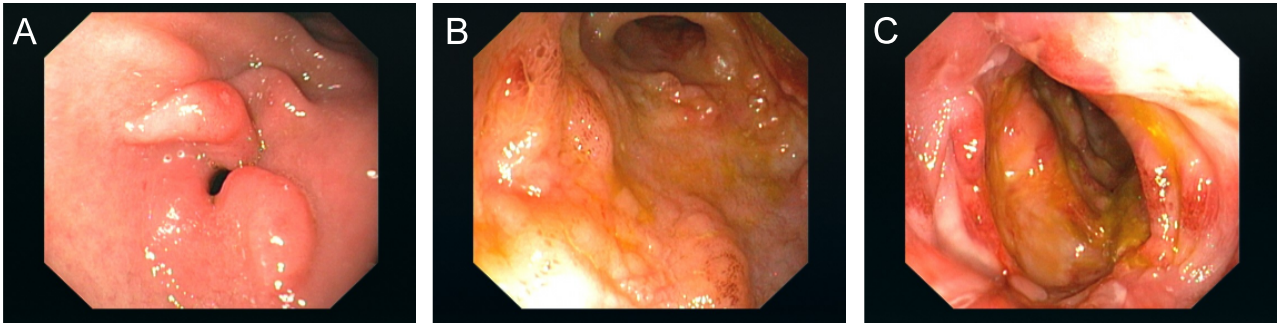

**Figure S5. Images of upper and lower gastrointestinal endoscopy of patient 3 (XIAP K297T).**

A. Gastric antrum with pyloric stenosis. B. Terminal ileitis. C. Colitis of the sigmoid colon.

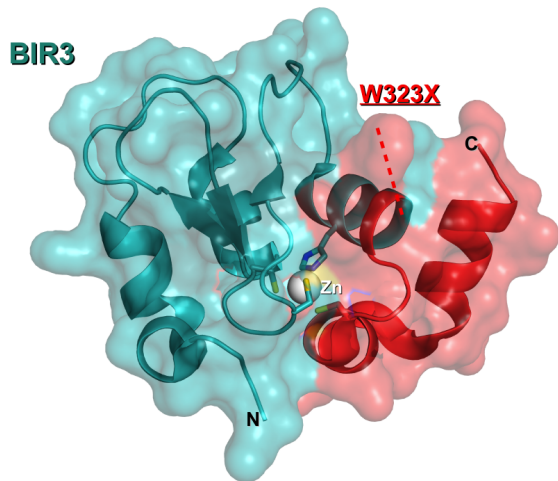

**Figure S6. Structural model illustrating the W323X variant (Patient 4).** Cartoon and surface representation of the XIAP BIR3 protein domain (PDB ID 2pop, chain B, residues 265-330). Truncation by W323X is indicated by a dashed line and deleted substructures are colored in red. W323X removes the C-terminus of BIR3 including one zinc-coordinating cysteine crucial for domain stability. The mutation likely impairs BIR3 function by preventing proper folding of the domain.

## **Supplementary Tables 1-5**

**Table S1.** Primer and PCR conditions for Sanger sequencing of *XIAP*.

| Primers        |             |                       |                       |
|----------------|-------------|-----------------------|-----------------------|
| Target         | Primer name | F-primer              | R-primer              |
| Exon 2, part 1 | E2a         | TTGCTTGTGTTTCACATTTTG | GTCTGGCCAGTTCTGAAAGG  |
| Exon 2, part2  | E2b         | TTGAAAATAGTGCCACGCAG  | CCATTTTGCTATTGGGGATG  |
| Exon 3         | E3          | TCTGGGGAACAGAGCCAG    | TTTCAAGCCATAGTGAAGGC  |
| Exon 4         | E4          | TGGGATAGGGAATTGGGTAAC | ACACTGCCCAGCTAGCTCTC  |
| Exon 5         | E5          | TCCTTCTAGCTCCATCAGGC  | CGCAGGCCTGTAGTCCC     |
| Exon 6         | E6          | GCTTTGCTTTGCTGGTTTG   | TGTCCATATCCACCTGTCCC  |
| Exon 7         | E7          | ACTTGTTGGGTGCTTGGC    | CTTGGTAGCAAATGCTAATGG |

| PCR temperature profile |        | 35 cycles |
|-------------------------|--------|-----------|
| 95°C                    | 12 min |           |
| 95°C                    | 30 sec |           |
| 60-65°C                 | 30 sec |           |
| 72°C                    | 30 sec |           |
| 72°C                    | 10 min |           |
| 10°C                    | ∞      |           |

| Annealing temperatures |            |
|------------------------|------------|
| 60°C                   | E2a, E2b   |
| 63°C                   | E3, E6, E7 |
| 65°C                   | E4, E5     |

**Table S2.** Summary of microbiological testing of patient 1 (XIAP E99X).

| <b>Patient age (months)</b>              | <b>20</b> | <b>20</b> | <b>24</b>     | <b>24</b> | <b>33</b> | <b>40</b> |
|------------------------------------------|-----------|-----------|---------------|-----------|-----------|-----------|
| <b>Material</b>                          | blood     | stool     | rectum biopsy | stool     | blood     | stool     |
| <b>CMV PCR</b>                           |           |           | neg           |           | neg       |           |
| <b>Adenovirus PCR</b>                    |           |           |               | neg       |           | neg       |
| <b>Norovirus PCR</b>                     |           | neg       |               | neg       |           | neg       |
| <b>Rotavirus PCR</b>                     |           |           |               | neg       |           | neg       |
| <b>Enteropathogenic bacteria culture</b> |           | neg       |               | neg       |           | neg       |
| <b>EBV-IgG</b>                           | neg       |           |               |           | neg       |           |
| <b>EBV-IgM</b>                           | neg       |           |               |           | neg       |           |
| <b>EBV-PCR</b>                           | neg       |           |               |           |           |           |
| <b>Atypical mycobacteria - PCR</b>       |           |           | neg           |           |           |           |

neg = negative; gray fields indicate data not available

**Table S3.** Summary of clinical laboratory data from patient 1 (XIAP E99X).

| Pat. age (months)                           | 19    | 20   | 22  | 27    | 31 | 34   | 38   | 40  | 53   | Reference   |
|---------------------------------------------|-------|------|-----|-------|----|------|------|-----|------|-------------|
| Hb (g/dl)                                   | 9.1   | 10.2 |     | 13.1  |    | 11.1 | 15.4 |     | 10.2 | 10.7-13.9   |
| Hkt (%)                                     | 27.6  | 31.5 |     | 38.4  |    |      | 46.5 |     | 32.9 | 32.5-41.5   |
| MCV (fl)                                    | 76    | 74   |     | 74    |    |      | 67   |     | 65   | 74-89       |
| Leukocytes (/nl)                            | 16.3  | 7.1  |     | 12.7  |    | 12.0 | 10.7 | 7.5 | 11.7 | 5.1-12.9    |
| Lymphocytes (/µl)                           | 11224 | 7106 |     |       |    |      |      |     |      | 3000-9500   |
| CD3 <sup>+</sup> cells (/µl)                |       |      |     | 3103  |    |      |      |     |      | 1800-3000   |
| CD4 <sup>+</sup> cells (/µl)                |       |      |     | 2288  |    |      |      |     |      | 700-1800    |
| CD8 <sup>+</sup> cells (/µl)                |       |      |     | 720   |    |      |      |     |      | 500-1500    |
| CD4/CD8 ratio                               |       |      |     | 3.18  |    |      |      |     |      | 0.865-1.885 |
| Natural Killer cells (/µl)                  |       |      |     | 247   |    |      |      |     |      | 200-600     |
| CD19 <sup>+</sup> cells (/µl)               |       |      |     | 804   |    |      |      |     |      | 300-1300    |
| Monocytes (/µl)                             |       |      |     | 797   |    |      |      |     |      | 50-1000     |
| Eosinophils (/µl)                           |       | 258  |     |       |    |      |      |     |      | 40-650      |
| Basophils (/µl)                             |       | 129  |     | 159   |    |      |      |     |      | 0-70        |
| Thrombocytes (/nl)                          | 287   | 135  |     | 330   |    | 428  |      |     | 277  | 286-509     |
| CRP (mg/l)                                  |       | 3.9  |     |       |    | 11.5 |      | 2.1 | 19.2 | < 5         |
| <b>Antibodies &amp; functional analysis</b> |       |      |     |       |    |      |      |     |      |             |
| IgA (g/l)                                   | 0.533 |      |     | 0.857 |    |      |      |     |      | 0.3-1.2     |
| IgG (g/l)                                   | 6.61  |      |     | 10.2  |    |      |      |     |      | 3.5-10      |
| IgM (g/l)                                   |       |      |     | 1.86  |    |      |      |     |      | 0.4-1.4     |
| IgG1 (g/l)                                  | 4.36  |      |     | 7.3   |    |      |      |     |      | 2.4-7.8     |
| IgG2 (g/l)                                  | 0.417 |      |     | 0.627 |    |      |      |     |      | 0.55-2      |
| IgG3 (g/l)                                  | 0.087 |      |     | 0.225 |    |      |      |     |      | 0.15-0.93   |
| IgG4 (g/l)                                  | 0.015 |      |     | 0.046 |    |      |      |     |      | 0.006-0.69  |
| IgE (kU/l)                                  | 41.3  |      |     |       |    |      |      |     |      | < 100       |
| anti-Transglutaminase IgA (kU/l)            | 2.1   |      |     |       |    |      |      |     |      | 0-9         |
| anti-Transglutaminase IgG (kU/l)            | 1.8   |      |     |       |    |      |      |     |      | 0-9         |
| ANA                                         |       |      | neg |       |    |      |      |     |      |             |
| pANCA                                       |       |      | neg |       |    |      |      |     |      |             |
| cANCA                                       |       |      | neg |       |    |      |      |     |      |             |
| anti-myeloperoxidase                        |       |      | neg |       |    |      |      |     |      |             |
| anti-proteinase                             |       |      | neg |       |    |      |      |     |      |             |
| anti-lactoferrin                            |       |      | neg |       |    |      |      |     |      |             |
| anti-elastase                               |       |      | neg |       |    |      |      |     |      |             |
| anti-cathepsin G                            |       |      | neg |       |    |      |      |     |      |             |
| anti-lysozyme                               |       |      | neg |       |    |      |      |     |      |             |
| anti-mitochondrial                          |       |      | neg |       |    |      |      |     |      |             |
| ASCA IgG                                    |       |      | pos |       |    |      |      |     |      |             |
| ASCA IgM                                    |       |      | pos |       |    |      |      |     |      |             |
| SAP staining                                |       |      |     |       | n  |      |      |     |      |             |
| Oxidative burst                             |       |      |     |       | n  |      |      |     |      |             |
| CD107 degranulation                         |       |      |     |       | n  |      |      |     |      |             |
| <b>Stool</b>                                |       |      |     |       |    |      |      |     |      |             |
| Calprotectin (mg/kg)                        |       |      |     |       |    | 592  |      |     |      |             |
| Elastase (µg/g stool)                       |       |      |     |       |    |      |      | 280 |      | > 200       |

n = normal, neg = negative, pos = positive, pat. = patient; gray fields indicate data not available

**Table S4.** Exome sequencing coverage (patient 1)

| <b>Sample</b> | <b>Coverage of exome target</b>       |                                       |                                        |                      |                       |
|---------------|---------------------------------------|---------------------------------------|----------------------------------------|----------------------|-----------------------|
|               | <b>% covered <math>\geq 1x</math></b> | <b>% covered <math>\geq 8x</math></b> | <b>% covered <math>\geq 20x</math></b> | <b>mean coverage</b> | <b>Gb of coverage</b> |
| father        | 96.98                                 | 92.87                                 | 86.88                                  | 69.45                | 4.31                  |
| mother        | 97.17                                 | 93.67                                 | 88.78                                  | 80.54                | 5.00                  |
| child         | 96.38                                 | 91.02                                 | 80.72                                  | 44.10                | 2.74                  |



**Table S5.** Information on variants in *FAM151A*, *RAPGEF4*, and *DCHS2* (patient 1, XIAP E99X)

| Gene    | Type   | Exonic Function     | Status in son | Status in parents | Amino Acid Change                     | SIFT | Poly-Phen2 | PhyloP | Mutation Taster |
|---------|--------|---------------------|---------------|-------------------|---------------------------------------|------|------------|--------|-----------------|
| FAM151A | exonic | frameshift deletion | homozygous    | both parents het  | NM_176782:c.1003_1031del;p.335_344del |      |            |        |                 |
| RAPGEF4 | exonic | nonsynonymous SNV   | heterozygous  | only father het   | NM_007023:c.G215A;p.R72H              | 0,14 | 1          | 1,000  | 1               |
| RAPGEF4 | exonic | nonsynonymous SNV   | heterozygous  | only mother het   | NM_001100397:c.G1504T;p.V502F         | 0,27 | 0,05       | 1,000  | 0,9953          |
| DCHS2   | exonic | nonsynonymous SNV   | heterozygous  | only father het   | NM_017639:c.G7513A;p.A2505T           | 0    | 0,980      | 0,999  | 0,4202          |
| DCHS2   | exonic | stopgain SNV        | heterozygous  | only mother het   | NM_017639:c.T6155G;p.L2052X           | 0,75 | 0,565      | 0,844  | 1               |
| DCHS2   | exonic | nonsynonymous SNV   | heterozygous  | only mother het   | NM_017639:c.G4561T;p.A1521S           | 0,92 | 0          | 0,149  | 2,70E-05        |
| Gene    | Chr    | Start               | End           | Obs               | Ref                                   |      |            |        |                 |
| FAM151A | chr1   | 55076138            | 55076166      | -                 | CACTCCACATTCAGACCGTCATCCCCAGG         |      |            |        |                 |
| RAPGEF4 | chr2   | 173662259           | 173662259     | A                 | G                                     |      |            |        |                 |
| RAPGEF4 | chr2   | 173882160           | 173882160     | T                 | G                                     |      |            |        |                 |
| DCHS2   | chr4   | 155156926           | 155156926     | T                 | C                                     |      |            |        |                 |
| DCHS2   | chr4   | 155158284           | 155158284     | C                 | A                                     |      |            |        |                 |
| DCHS2   | chr4   | 155219540           | 155219540     | A                 | C                                     |      |            |        |                 |

## **Supplementary References**

- 1 Levine A, Griffiths A, Markowitz J, Wilson DC, Turner D, Russell RK, *et al.* Pediatric modification of the Montreal classification for inflammatory bowel disease: the Paris classification. *Inflamm Bowel Dis* 2011;**17**:1314-21.
- 2 Cummins JM, Kohli M, Rago C, Kinzler KW, Vogelstein B, Bunz F. X-linked inhibitor of apoptosis protein (XIAP) is a nonredundant modulator of tumor necrosis factor-related apoptosis-inducing ligand (TRAIL)-mediated apoptosis in human cancer cells. *Cancer Res* 2004;**64**:3006-8.
- 3 Zeissig S, Dougan SK, Barral DC, Junker Y, Chen Z, Kaser A, *et al.* Primary deficiency of microsomal triglyceride transfer protein in human abetalipoproteinemia is associated with loss of CD1 function. *J Clin Invest* 2010;**120**:2889-99.
- 4 Marsh RA, Villanueva J, Zhang K, Snow AL, Su HC, Madden L, *et al.* A rapid flow cytometric screening test for X-linked lymphoproliferative disease due to XIAP deficiency. *Cytometry B Clin Cytom* 2009;**76**:334-44.
- 5 Krieg A, Correa RG, Garrison JB, Le Negrato G, Welsh K, Huang Z, *et al.* XIAP mediates NOD signaling via interaction with RIP2. *Proc Natl Acad Sci U S A* 2009;**106**:14524-9.
- 6 Breckpot K, Dullaers M, Bonehill A, van Meirvenne S, Heirman C, de Greef C, *et al.* Lentivirally transduced dendritic cells as a tool for cancer immunotherapy. *J Gene Med* 2003;**5**:654-67.
